# Supplementary material for: A sensitive and efficient trifluoroacetyl-based aromatic fluorescent probe for organic amine vapour detection
Source: Royal Society of Chemistry journal article supplement (doi:10.1039/c5ra00363f), 2015-01-01
Supplement: c5ra00363f1.pdf [file c5ra00363f1.pdf]

## Supporting Information

### **The Sensitive and Efficient Trifluoroacetyl-based Aromatic Fluorescent Probe for Organic Amine Vapour Detection**

Junjun Yao<sup>a,b</sup>, Yanyan Fu<sup>a</sup>, Wei Xu<sup>a</sup>, Tianchi Fan<sup>a,b</sup>, Qingguo He<sup>a\*</sup>, Defeng Zhu<sup>a</sup>,  
Huimin Cao<sup>a</sup> and Jiangong Cheng<sup>a\*</sup>

<sup>a</sup>State Key Lab of Transducer Technology, Shanghai Institute of Microsystem and Information Technology, Chinese Academy of Sciences, Changning Road 865, Shanghai 200050, China. E-mail: hqg@mail.sim.ac.cn; jgcheng@mail.sim.ac.cn. Fax:+86-21-62511070-8934; Tel: +86-21-62511070-8967

<sup>b</sup>University of the Chinese Academy of Sciences, Yuquan Road 19, Beijing,100039, China

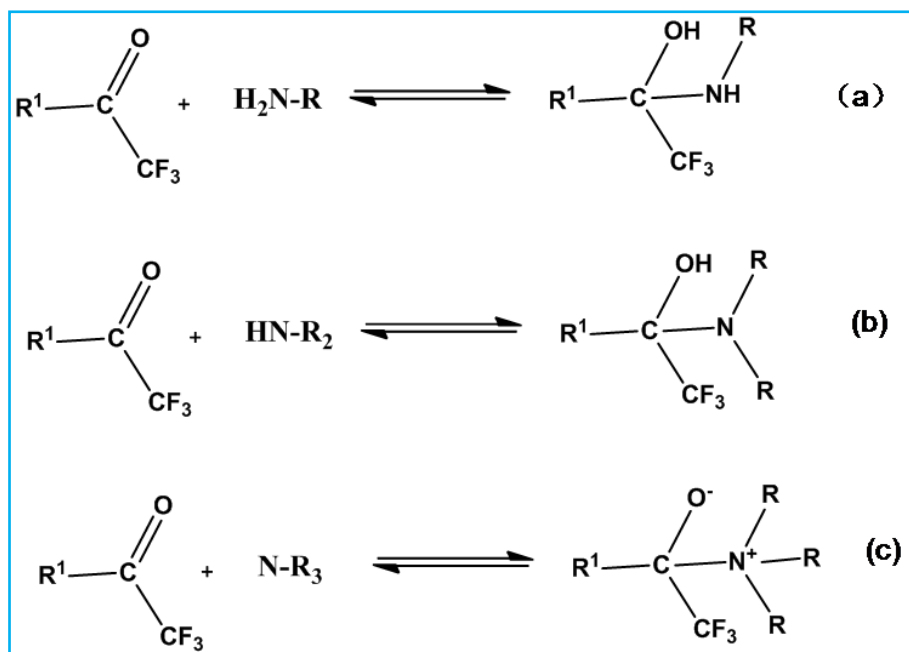

Figure S1. Chemical reaction of trifluoroacetyl group with primary (a) and secondary (b) tertiary (c) amines.

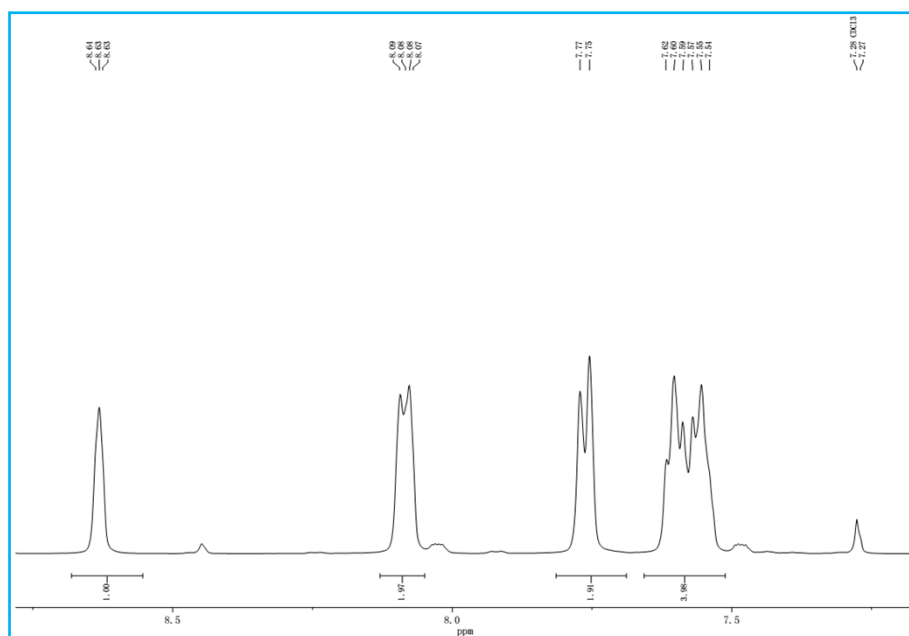

Figure S2.  $^1\text{H}$  NMR spectrum of ANT-TFA in  $\text{CDCl}_3$ .

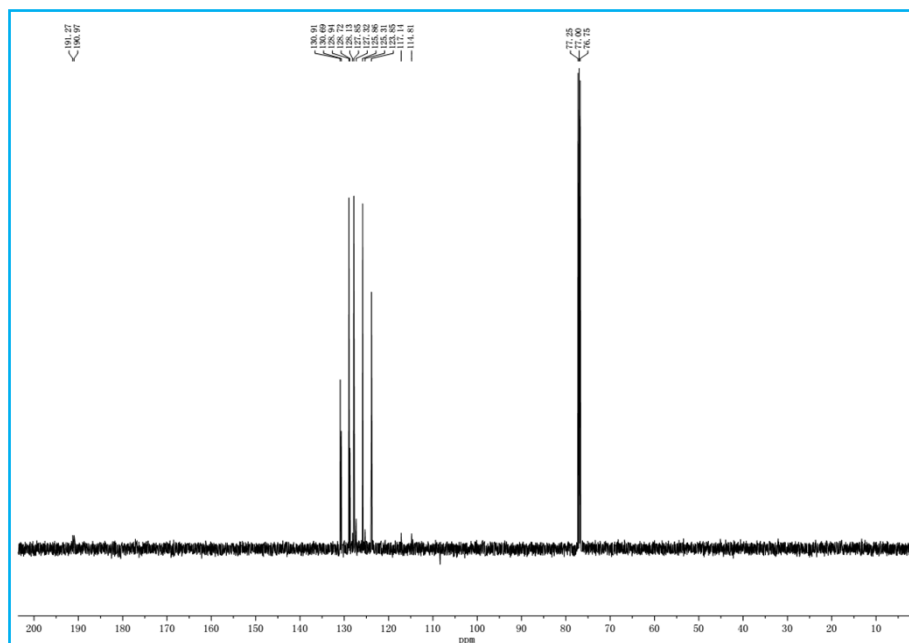

Figure S3.  $^{13}\text{C}$  NMR spectrum of ANT-TFA in  $\text{CDCl}_3$ .

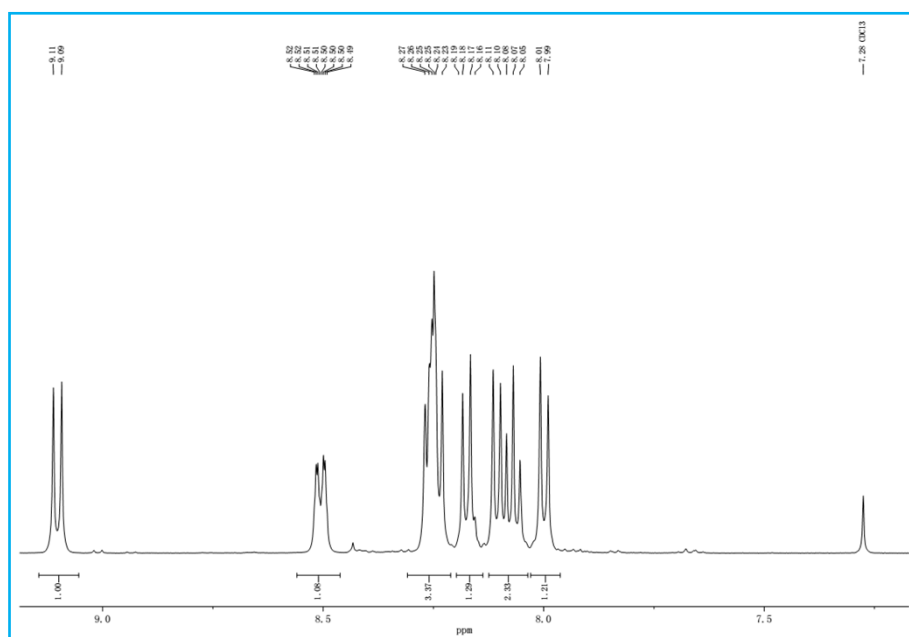

Figure S4.  $^1\text{H}$  NMR spectrum of PY-TFA in  $\text{CDCl}_3$ .

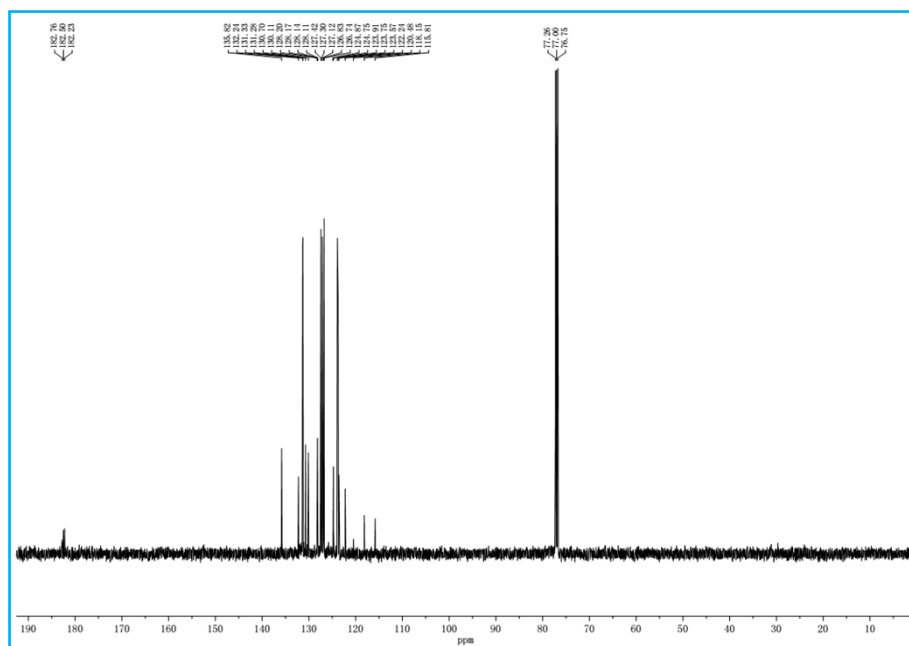

Figure S5.  $^{13}\text{C}$  NMR spectrum of **PY-TFA** in  $\text{CDCl}_3$ .

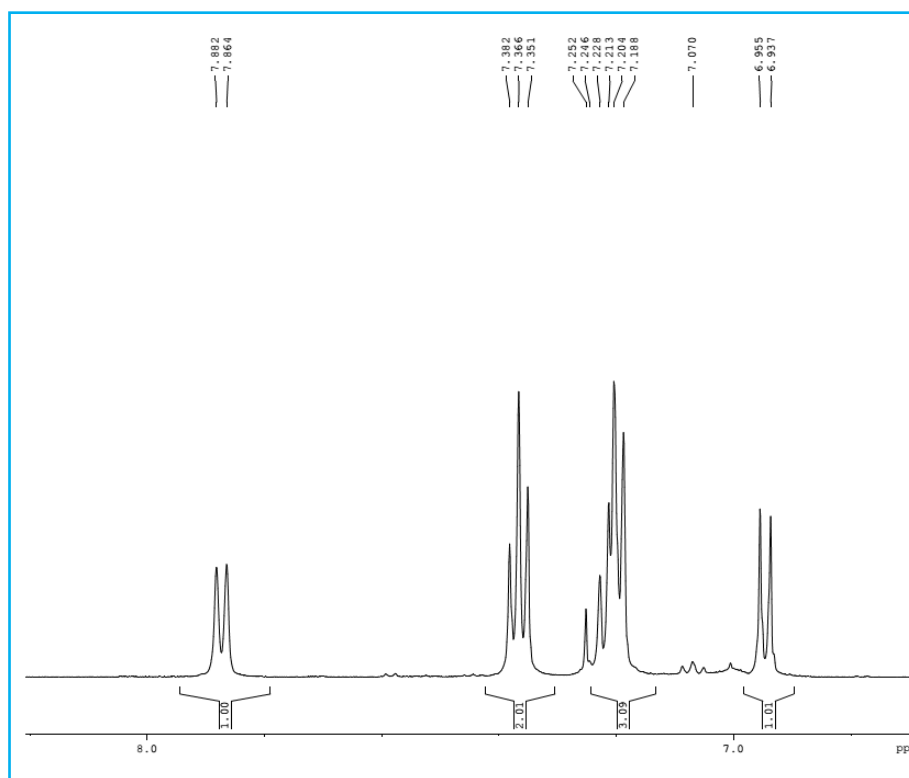

Figure S6.  $^1\text{H}$  NMR spectrum of **TPA-TFA** in  $\text{CDCl}_3$ .

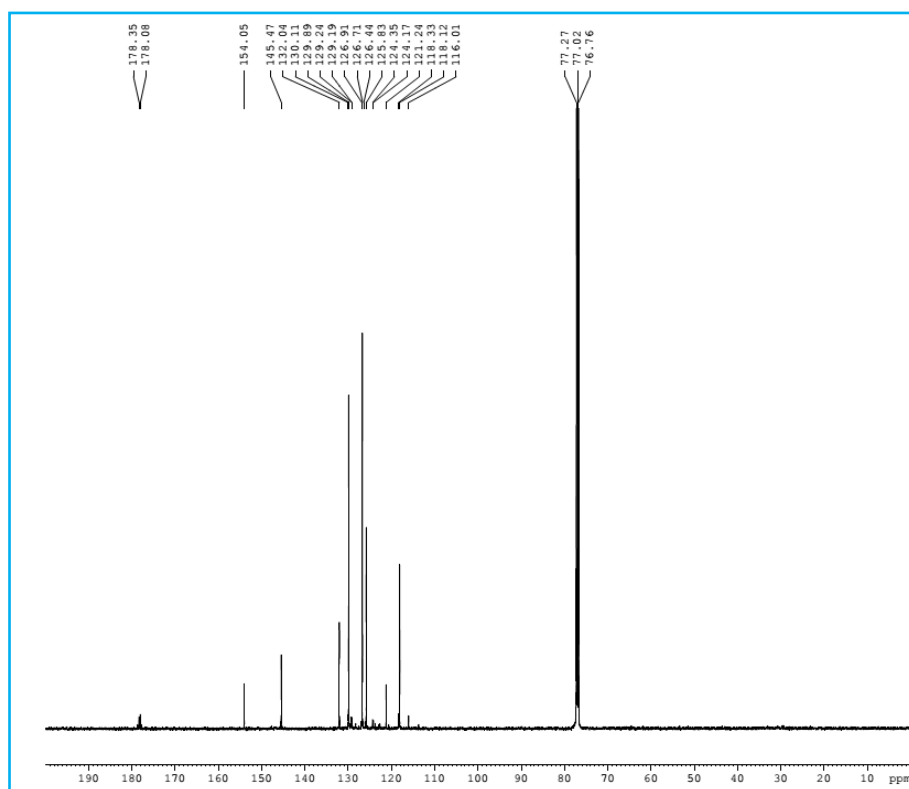

Figure S7.  $^{13}\text{C}$  NMR spectrum of **TPA-TFA** in  $\text{CDCl}_3$ .

Table S1. Detail methodology and parameters of DMol3

| <b>DMol3</b>         |                             |
|----------------------|-----------------------------|
| Task                 | Geometry Optimization       |
| Properties           | Optics, Orbitals            |
| Energy               | $1.0^{-5}\text{Ha}$         |
| Max. force           | $0.002\text{Ha}/\text{\AA}$ |
| Max. displacement    | $0.005\text{\AA}$           |
| Max. iterations      | 50                          |
| Max. step size       | $0.3\text{\AA}$             |
| Functional           | GGA,BLYP                    |
| Integration accuracy | Fine                        |

---

|                    |              |
|--------------------|--------------|
| SCF tolerance      | Fine         |
| Core treatment     | All Electron |
| Basis set          | DNP+         |
| Basis file         | 4.4          |
| Orbital cutoff     | Fine         |
| quality            |              |
| Run in parallel on | 12 cores     |

---

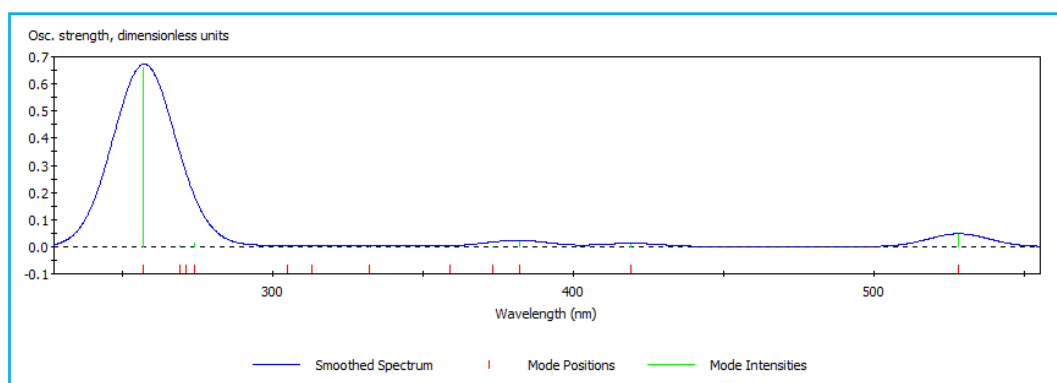

Figure S8. DMol3 optical absorption spectrum of **ANT-TFA**.

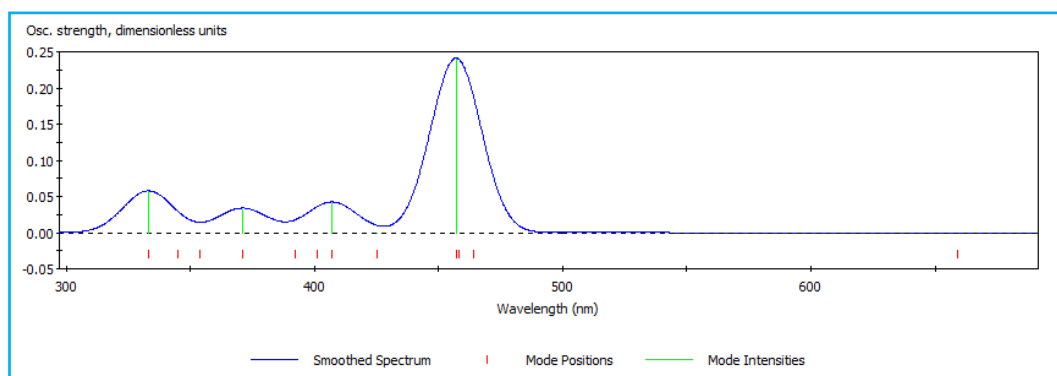

Figure S9. DMol3 optical absorption spectrum of **PY-TFA**.

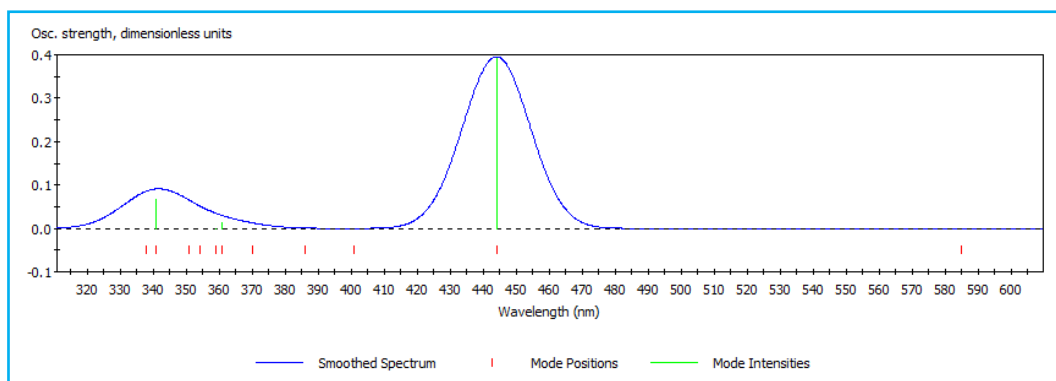

Figure S10. DMol3 optical absorption spectrum of **TPA-TFA**.

In order to confirm CT nature of the electronic transition, we choose five different solvents to carryout solvent dependent absorption and emission spectral studies of all the three dyes. The results were summarized in Table S2, S3 and Figure S11~S13.

Table S2. The absorption and fluorescence spectra of **ANT-TFA**, **PY-TFA** and **TPA-TFA** in different solvents.

| Solvents        | $\Delta f$ | <b>ANT-TFA</b>             |                            | <b>PY-TFA</b>              |                            | <b>TPA-TFA</b>             |                            |
|-----------------|------------|----------------------------|----------------------------|----------------------------|----------------------------|----------------------------|----------------------------|
|                 |            | $\lambda_{ab}^{\max}$ (nm) | $\lambda_{em}^{\max}$ (nm) | $\lambda_{ab}^{\max}$ (nm) | $\lambda_{em}^{\max}$ (nm) | $\lambda_{ab}^{\max}$ (nm) | $\lambda_{em}^{\max}$ (nm) |
| Cyclohexane     | -0.00165   | 365                        | 449                        | 376                        | 440                        | 377                        | 448                        |
| Toluene         | 0.013235   | 366                        | 425                        | 377                        | 443                        | 378                        | 510                        |
| Tetrahydrofuran | 0.209572   | 365                        | 427                        | 376                        | 445                        | 377                        | 543                        |
| Dichloromethane | 0.218391   | 365                        | 427                        | 377                        | 456                        | 376                        | 558                        |
| Acetonitrile    | 0.305417   | 366                        | 428                        | 376                        | 463                        | 376                        | 445                        |

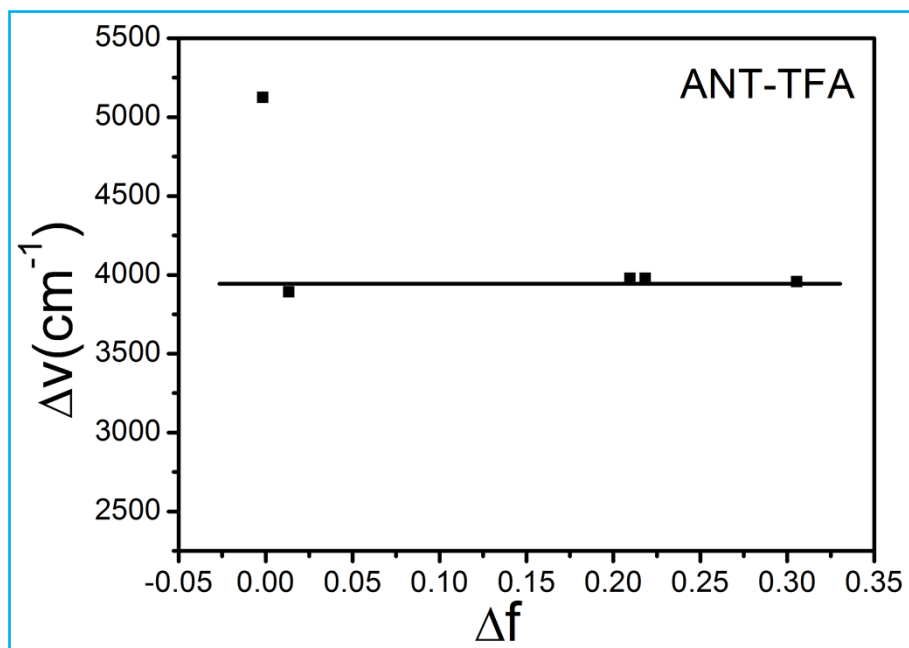

Figure S11. Lippert-Mataga equation curve of **ANT-TFA**.

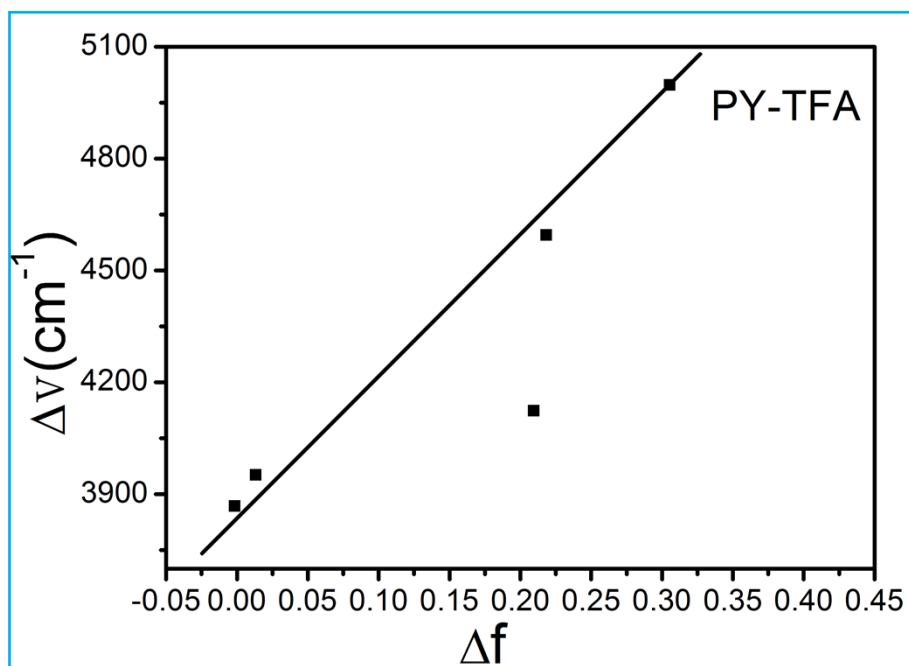

Figure S12. Lippert-Mataga equation curve of **PY-TFA**.



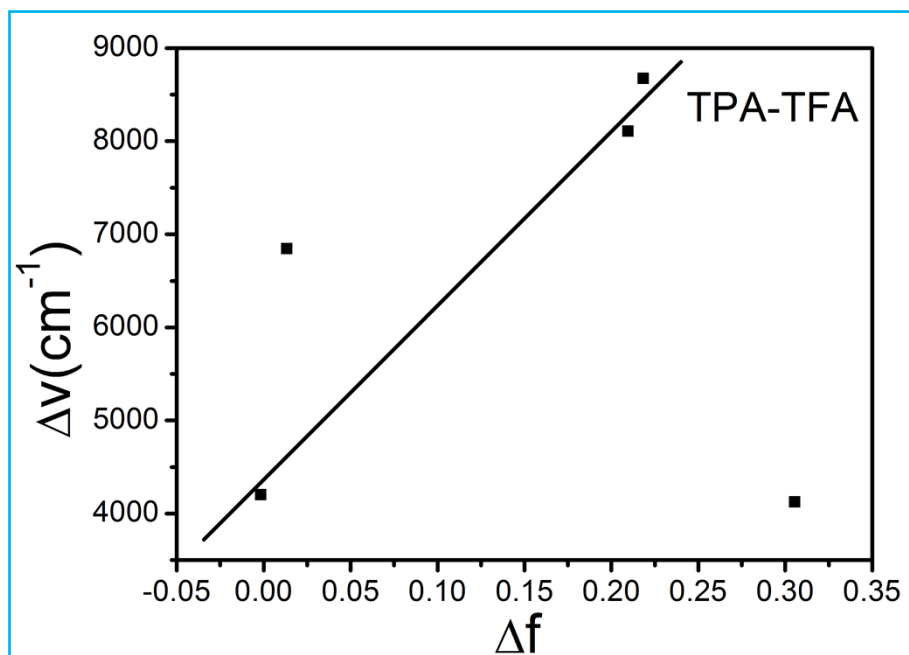

Figure S13. Lippert-Mataga equation curve of **TPA-TFA**.

Lippert-Mataga equation :  $\Delta \bar{\nu} = \bar{\nu}_{\text{abs}} - \bar{\nu}_{\text{f}} = \frac{2\Delta f}{hca^3} (\mu_{s1} - \mu_{s0})^2 + \text{const}$

Table S3. Lippert-Mataga equation parameters of **ANT-TFA**, **PY-TFA** and **TPA-TFA**.

|         | $h(10^{-34}\text{J}\cdot\text{s})$ | $c(10^8\text{m/s})$ | $a(\text{\AA})$ | slope   | $u_{s1}-u_{s0}(10^{-25}\text{C}\cdot\text{m.})$ |
|---------|------------------------------------|---------------------|-----------------|---------|-------------------------------------------------|
| ANT-TFA |                                    |                     | 4.7915          | 0       | 0                                               |
| PY-TFA  | 6.626                              | 3.0                 | 5.514           | 3527.2  | 2.424                                           |
| TPA-TFA |                                    |                     | 6.005           | 19477.8 | 6.475                                           |

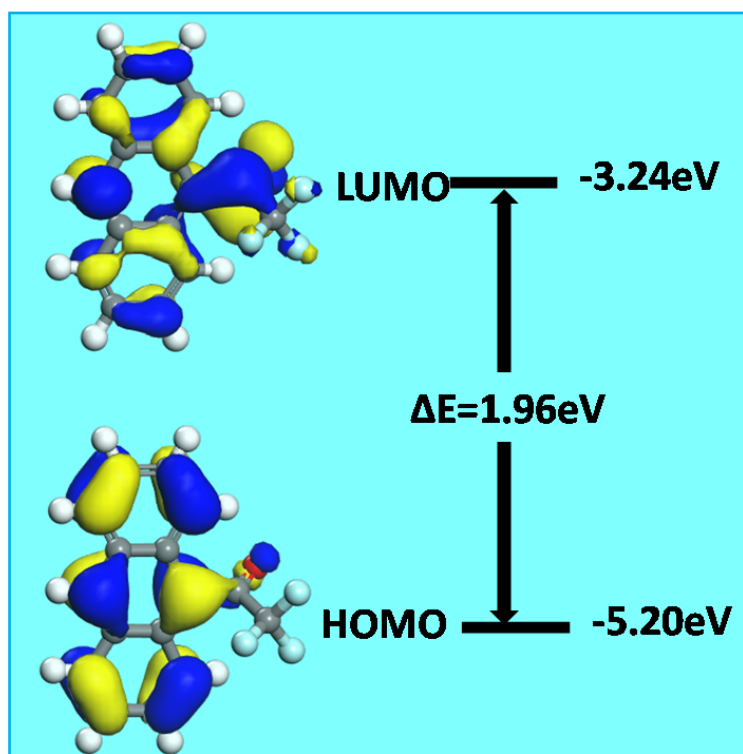

Figure S14. Optimized molecular structure and molecular orbitals of  
**ANT-TFA.**

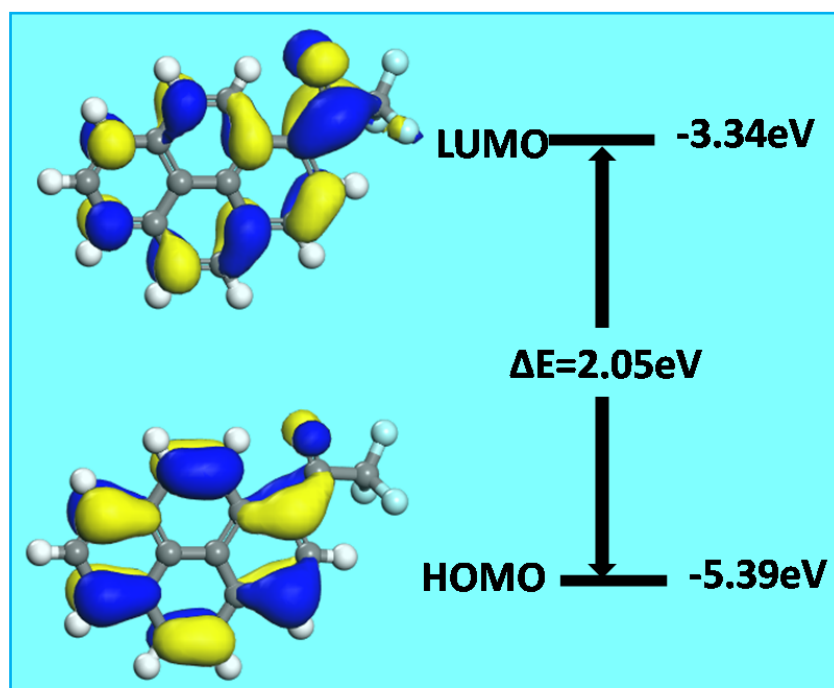

Figure S15. Optimized molecular structure and molecular orbitals of **PY-TFA.**

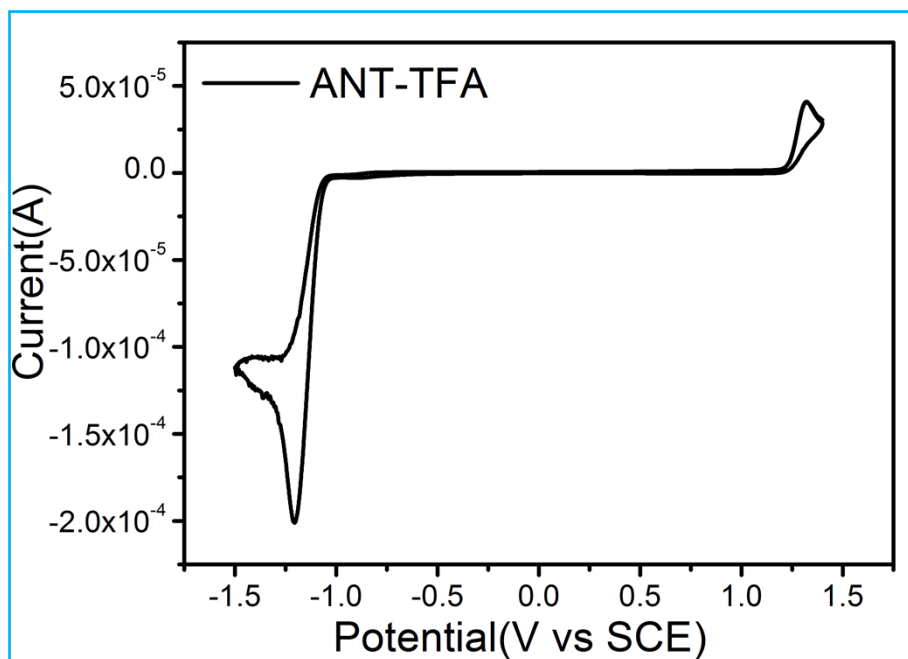

Figure S16. Cyclic voltammetric curve of **ANT-TFA**.

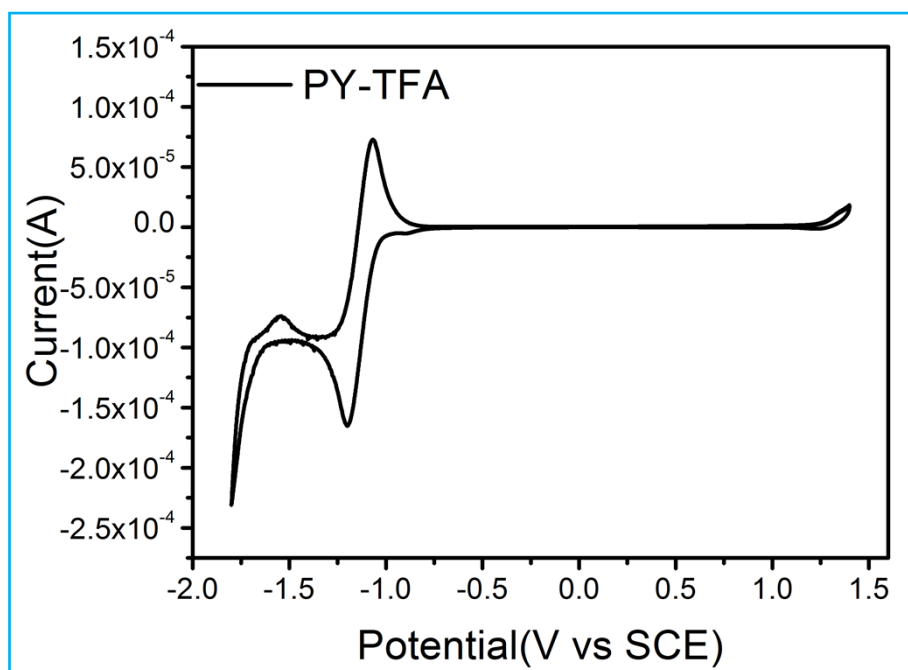

Figure S17. Cyclic voltammetric curve of **PY-TFA**.

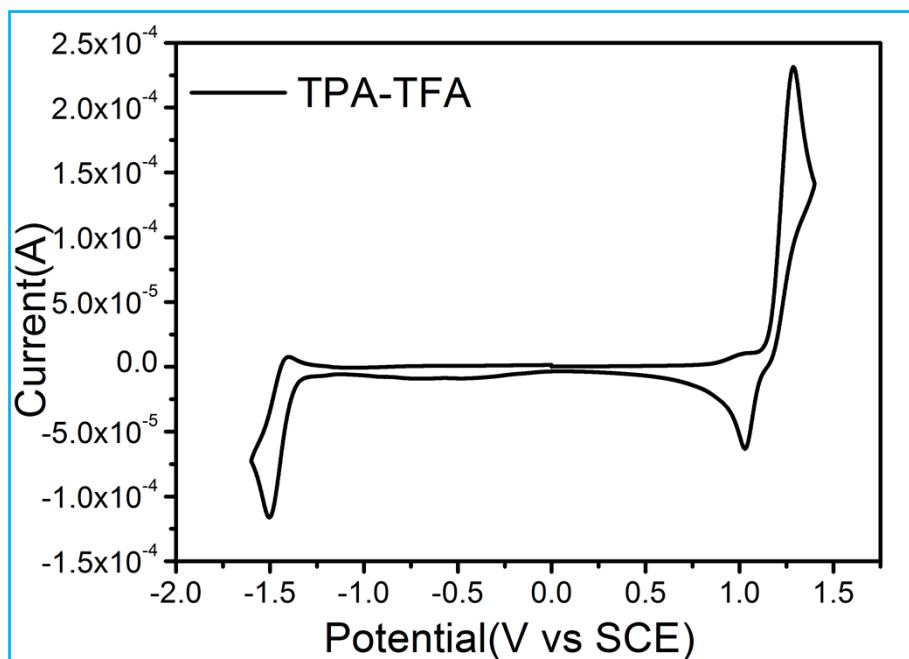

Figure S18. Cyclic voltammetric curve of **TPA-TFA**.

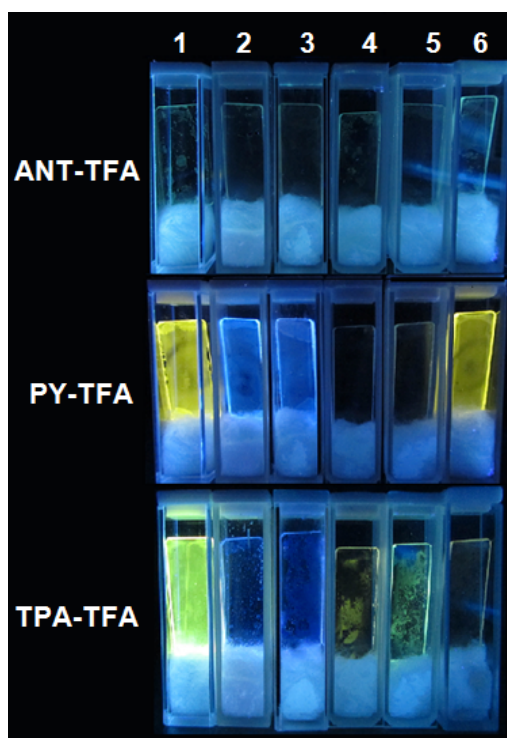

Figure S19. **ANT-TFA**, **PY-TFA**, **TPA-TFA** films excited by UV lamp 365 nm after 100s exposure in air and several saturated organic amine vapour (1 air, 2 *isobutylamine*, 3 *n-octylamine*, 4 *diisopropylamine*, 5 *dipentylamine*, 6 *o-toluidine*).

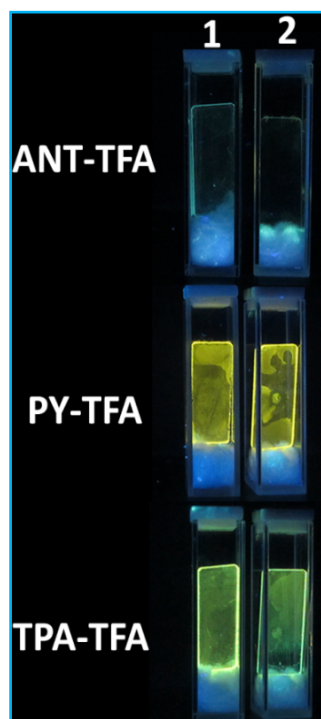

Figure S20. ANT-TFA, PY-TFA, TPA-TFA films excited by UV lamp 365nm after 100s exposure in air and aliphatic tertiary amine vapour (1 air, 2 triethylamine).

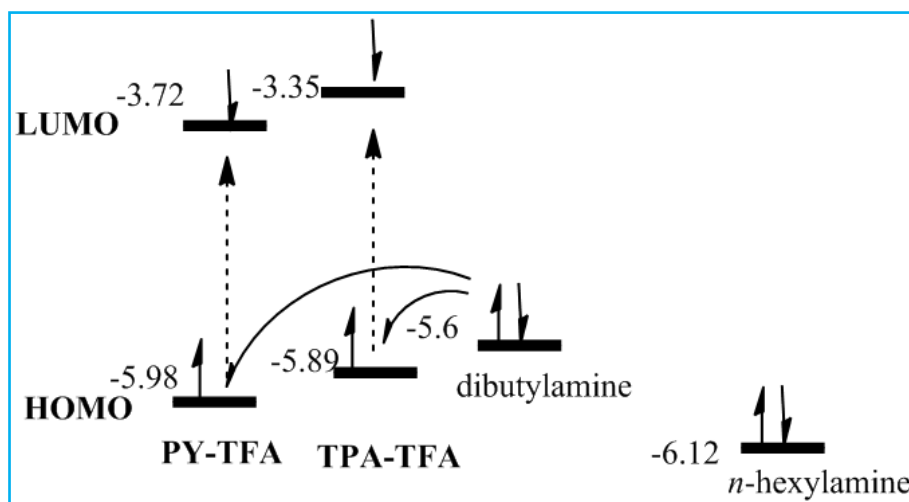

Figure S21. Photoinduced electron transfer mechanism for secondary amine sensing.

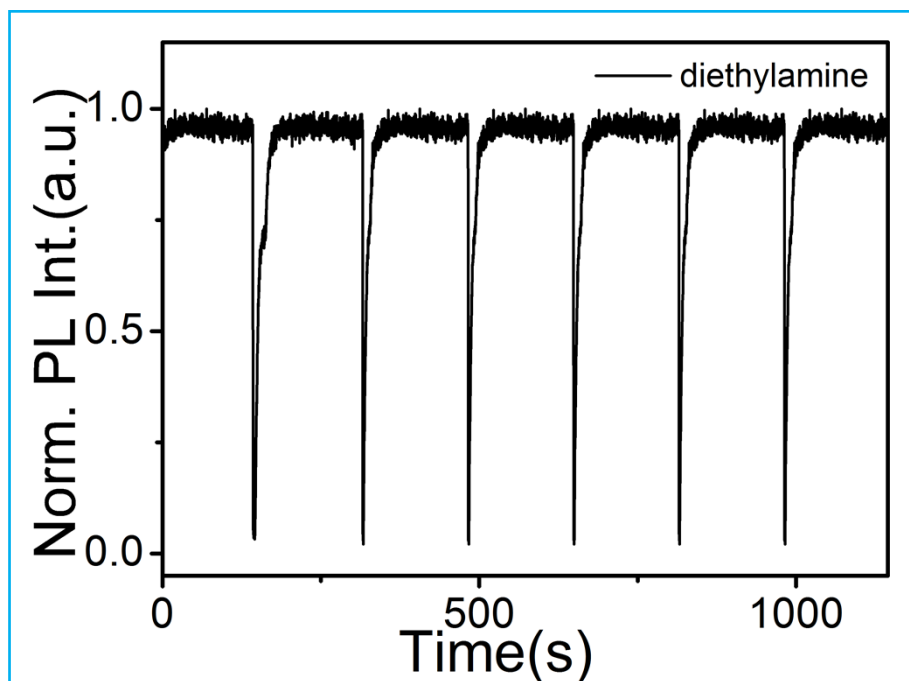

Figure S22. Repeatability of TPA-TFA film exposed to diethylamine vapour, the emission intensity was monitored at 525 nm.

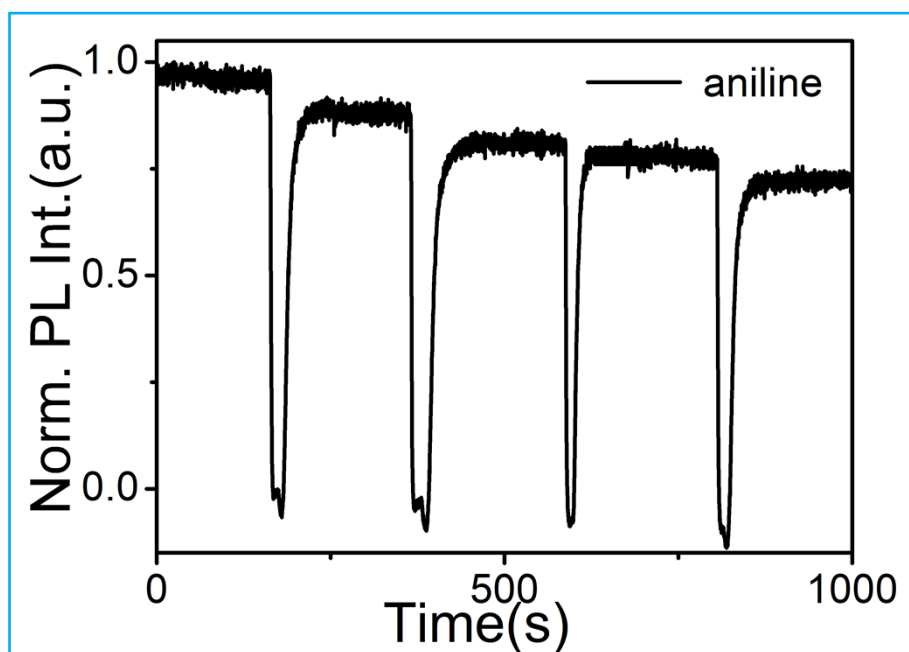

Figure S23. Repeatability of TPA-TFA film exposed to aniline vapour, the emission intensity was monitored at 525 nm.

Figure S24~S28 showed the time-course fluorescence responses of **TPA-TFA** films exposed to the different concentrations of amine vapour: All the first exposures were at the saturated vapour pressure of different amines at 20°C (Table S4), after elution with air, the next exposure was at a half-diluted concentration of the previous vapour. All the emission intensities were monitored at 525 nm.

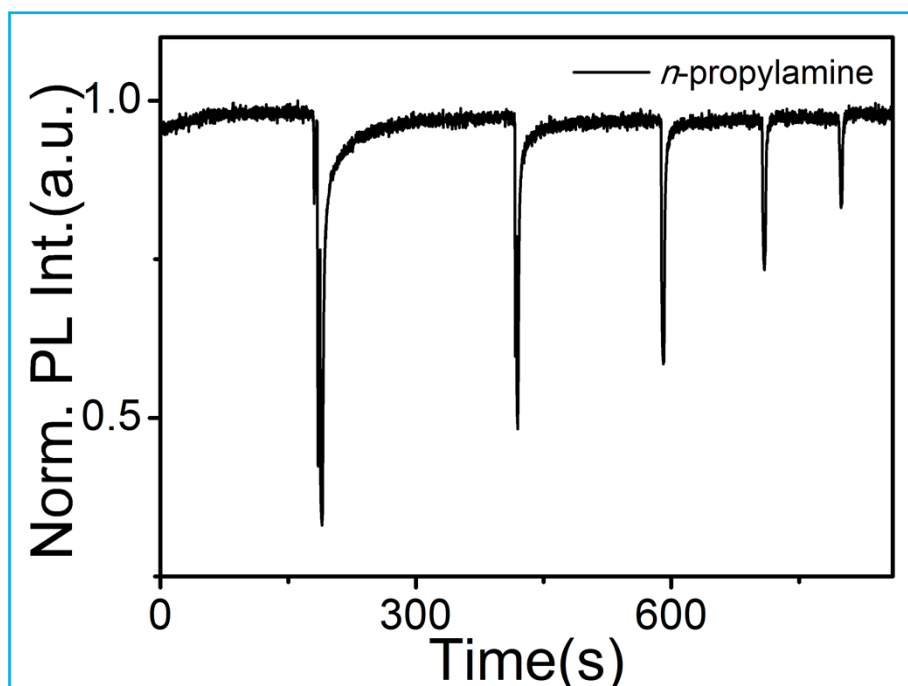

Figure S24. Time-course fluorescence responses of **TPA-TFA** films exposed to the different concentrations of *n*-propylamine vapour.

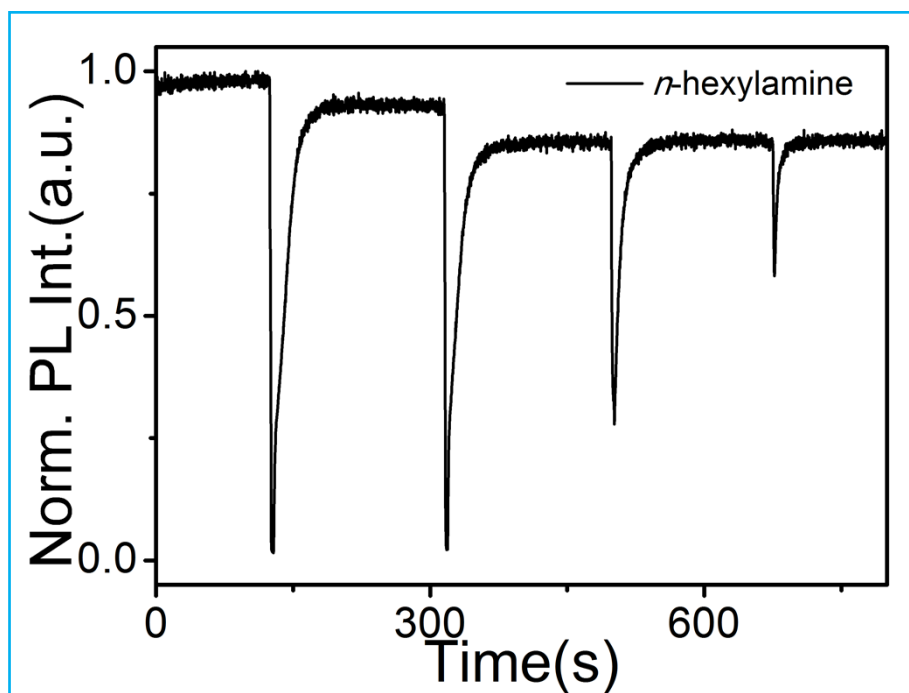

Figure S25. Time-course fluorescence responses of TPA-TFA films exposed to the different concentrations of *n*-hexylamine vapour.

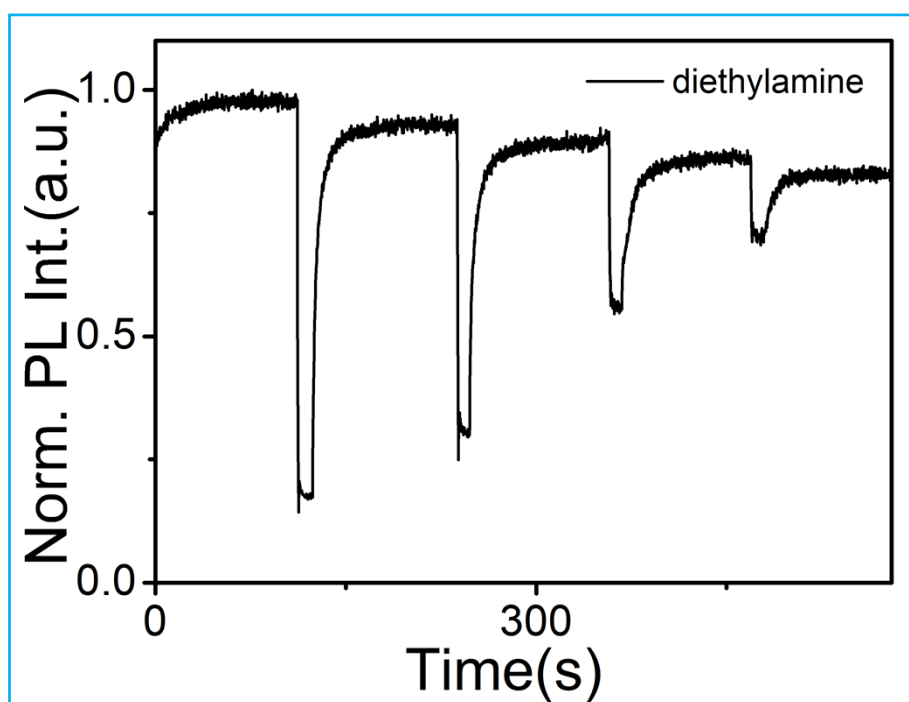

Figure S26. Time-course fluorescence responses of TPA-TFA films exposed to the different concentrations of diethylamine vapour.



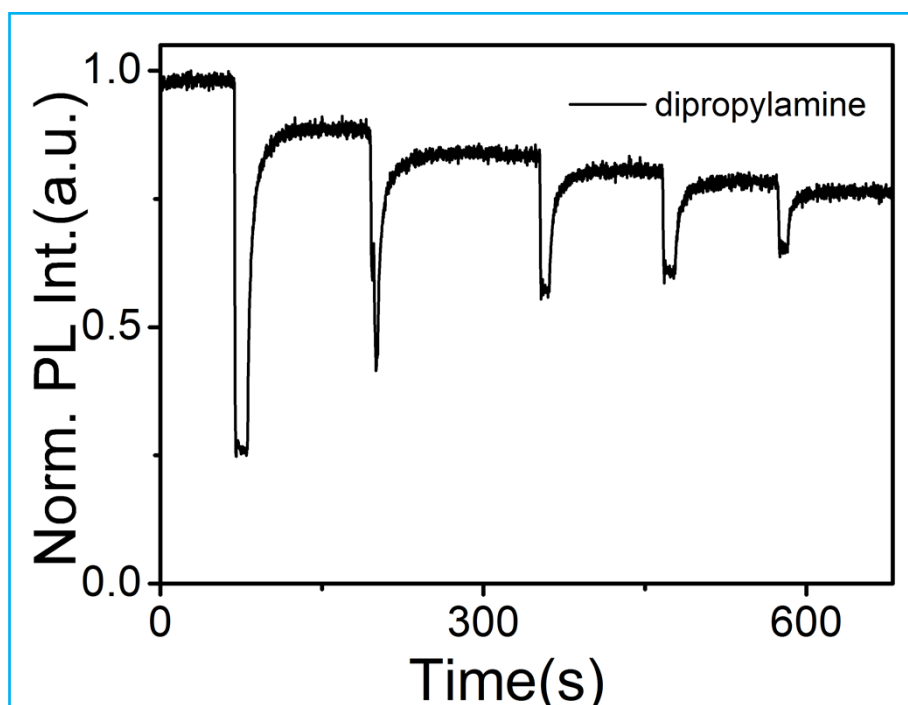

Figure S27. Time-course fluorescence responses of **TPA-TFA** films exposed to the different concentrations of dipropylamine vapour.

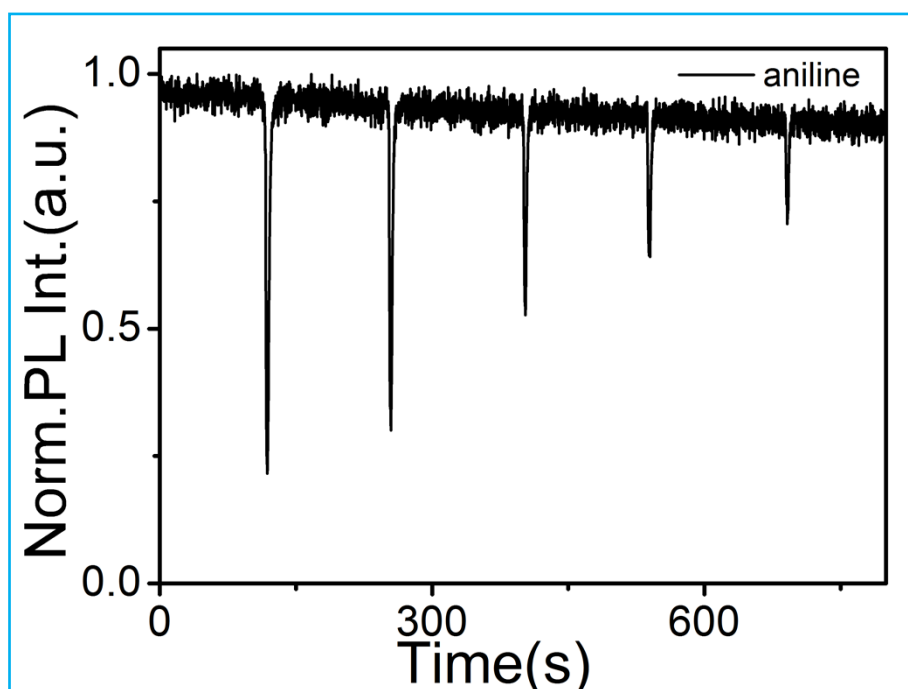

Figure S28. Time-course fluorescence responses of **TPA-TFA** films exposed to the different concentrations of aniline vapour.

Table S4. The saturated vapour pressure of different amines at 20°C.

| amine                 | saturated vapour pressure(ppm) |
|-----------------------|--------------------------------|
| <i>n</i> -propylamine | $3.25 \times 10^5$             |
| <i>n</i> -hexylamine  | $8.78 \times 10^3$             |
| diethylamine          | $2.48 \times 10^5$             |
| dipropylamine         | $2.36 \times 10^4$             |
| aniline               | 557.12                         |

Table S5. Detection limit of **PY-TFA** and **TPA-TFA** films exposed to different amines.

| amine                 | detection limit (ppm) |               |
|-----------------------|-----------------------|---------------|
|                       | <b>TPA-TFA</b>        | <b>PY-TFA</b> |
| <i>n</i> -propylamine | 0.01                  | 3.51          |
| <i>n</i> -hexylamine  | 5.01                  | 0.98          |
| diethylamine          | $1.73 \times 10^{-4}$ | 2.04          |
| dipropylamine         | 0.198                 | 1.55          |
| aniline               | $2.35 \times 10^{-4}$ | /             |

We obtained the IDLH concentrations from the official data published by the Centers for Disease Control and Prevention, USA. The web link is as bellow: <http://www.cdc.gov/niosh/idlh/>.
